# Supplementary material for: FACS-array profiling of striatal projection neuron subtypes in juvenile and adult mouse brains
Source: Springer Nature journal article supplement (doi:10.1038/nn1654), 2006-02-19
Supplement: nn1654-S6.pdf [file nn1654-S6.pdf]

## P20 experiments

| Independent Experiment 1      |        |          |        |                               |
|-------------------------------|--------|----------|--------|-------------------------------|
| D1 P20 Biological replicate 1 | D1-cy3 | slide 1  | D2-cy5 | D2 P20 Biological replicate 1 |
|                               | D1-cy5 | slide 2  | D2-cy3 |                               |
| Independent Experiment 2      |        |          |        |                               |
| D1 P20 Biological replicate 2 | D1-cy3 | slide 3  | D2-cy5 | D2 P20 Biological replicate 2 |
|                               | D1-cy5 | slide 4  | D2-cy3 |                               |
| Independent Experiment 3      |        |          |        |                               |
| M4 P20 Biological replicate 1 | M4-cy3 | slide 5  | D2-cy5 | D2 P20 Biological replicate 3 |
|                               | M4-cy5 | slide 6  | D2-cy3 |                               |
| Independent Experiment 4      |        |          |        |                               |
| M4 P20 Biological replicate 2 | M4-cy3 | slide 7  | D2-cy5 | D2 P20 Biological replicate 4 |
|                               | M4-cy5 | slide 8  | D2-cy3 |                               |
| Independent Experiment 5      |        |          |        |                               |
| M4 P20 Biological replicate 3 | M4-cy3 | slide 9  | D2-cy5 | D2 P20 Biological replicate 5 |
|                               | M4-cy5 | slide 10 | D2-cy3 |                               |

## Adult (2 month) experiments

| Independent Experiment 6     |        |          |        |                              |
|------------------------------|--------|----------|--------|------------------------------|
| D1 2m Biological replicate 1 | D1-cy3 | slide 11 | D2-cy5 | D2 2m Biological replicate 1 |
|                              | D1-cy5 | slide 12 | D2-cy3 |                              |
| Independent Experiment 7     |        |          |        |                              |
| D1 2m Biological replicate 2 | D1-cy3 | slide 13 | D2-cy5 | D2 2m Biological replicate 2 |
|                              | D1-cy5 | slide 14 | D2-cy3 |                              |

**Supplementary Table 1.** Experimental chart of performed microarray hybridizations. To maximize the number of analyzed genes, outlined experiments have been performed on two different Agilent platforms, Developmental and Mouse I microarrays. In each independent experiment two different slides have been used for technical replicate and the dye swap. The comparisons have been made between the samples hybridized onto the same array. Each biological replicate represents a distinct neuronal subtype derived from a different group of mice.
